# Supplementary material
Source: PubMed Central journal article supplement (PMC2730838)
Supplement: NIHMS67100-supplement-Supp.pdf [file NIHMS67100-supplement-Supp.pdf]

## Supporting Online Material

### Figure Legends.

**Supplemental Figure 1.** Consistent waveforms across stimulus amplitude suggest that the example invariant neuron shown in Figures 1 and 2 is a single neuron. Spike raster, with line separating song intensities, showing the response of the intensity invariant neuron from Figures 1 and 2 to randomly repeated presentations of either **A**, Song A or **B**, Song B. **C**, Waveforms for the invariant neuron separated by song intensity. Red lines indicate mean and plus and minus one standard deviation.

**Supplemental Figure 2.** Quality of unit isolation, as quantified by the number of 1 ms violations, do not correlate with invariance or other response measures. **A**, scatter plot of 1 ms violations with invariance **B**, performance, **C**, sparseness and **D**, intrastimulus  $R_{\text{corr}}$ .

**Supplemental Figure 3.** Performance as a function of the  $\tau$  value used in the van Rossum spike distance metric. The optimal timing for discrimination is approximately 10 ms across the stimulus intensities. At a  $\tau$  value of 1000 ms the discrimination performance is at or near chance level. This corresponds to discrimination based upon a spike count. **A**, percent correct as a function of  $\tau$  for the sensitive neuron example from figures 1 and 2 **B**, percent correct as a function of  $\tau$  for the invariant neuron example from figures 1 and 2.

**Supplemental Figure 4.** Examples of 3 intensity discrimination invariant neural recordings. **A**, Spike raster for the two songs and spike distance matrix for recording with

invariance index of 0.93. **B**, similarly for another recording with invariance index of 0.92 and **C**, third recording with invariance index of 0.89.

**Supplemental Figure 5.** Correlations between invariance and the three response properties shown in Figure 3 after the arcsine transformation to reduce heteroscedasticity within the original distribution. **A**, scatter plot of 1 ms violations with performance, **B**, intrastimulus  $R_{\text{corr}}$  and **C**, temporal sparseness. All values are in radians.

**Supplemental Figure 6.** Example intensity invariant neuron from dataset testing discrimination using 5 different songs at 5 different intensities. **A**, spike raster for the 5 songs with lines separating the different intensities. **B**, MDS for the 5 song categories across all tested intensities. **C**, discrimination performance curve for this neuron across the range of intensities tested.
